# Supplementary material for: Insulin management in hospitalized patients with diabetes mellitus on high-dose glucocorticoids: Management of steroid-exacerbated hyperglycemia
Source: PLOS journal article supplement (doi:10.1371/journal.pone.0256682), 2021-09-16
Supplement: S1 (10.1371/journal.pone.0256682.s001) [file journal.pone.0256682.s001]

## General Medicine/Surgical Floor Analog Insulin Inpatient Glucose Control Guidelines at Cook County Health System

1. Order Blood Glucose (BG) fingersticks TID AC & bedtime if eating meals or order BG fingersticks Q 6 hrs if nutrition per tube feedings, TPN, IV with dextrose or NPO.
2. Order Baseline Hemoglobin A1c
3. Start insulin on any patient with a random BG > 200mg/dL or a pre-prandial BG > 180 mg/dL x 2 readings within 24 hours. Use insulin both basal (on **all** patients) and prandial (only with meals). Choose supplemental insulin algorithm (order the same insulin as prandial) according to daily insulin requirements (see below).
4. Targets are **BG 140-180mg/dL** pre-prandial and fasting periods. Stable patients with low risk of hypoglycemia can be kept in the 110-140 mg/dL range.
5. Reassess patients **every 24 hours** and incorporate patient's supplemental requirements into scheduled insulin by adding the total supplemental doses received over 24 hours, divide the total by 3 (i.e. 3 meals) and add each to the prandial doses

### Diabetes Analog Insulin Protocol For Type 1 and Type II

|                                                     |                                                                                                                                                                                                                                                                                                                                                                                                                                                                                                                                                                                                                                                                                                                                                                                                                                                                         |
|-----------------------------------------------------|-------------------------------------------------------------------------------------------------------------------------------------------------------------------------------------------------------------------------------------------------------------------------------------------------------------------------------------------------------------------------------------------------------------------------------------------------------------------------------------------------------------------------------------------------------------------------------------------------------------------------------------------------------------------------------------------------------------------------------------------------------------------------------------------------------------------------------------------------------------------------|
| <b>Initiating Insulin</b>                           | <ul style="list-style-type: none"> <li>▪ Total daily dose (TDD) can be calculated based on weight:<br/><b><u>for GFR&gt;30ml/min</u> calculate 0.5 units/kg/day, <u>for GFR&lt;30ml/min</u> calculate 0.25 units/kg/day.</b> One half of TDD should be basal insulin, remaining half is prandial divided by 3 into TID AC</li> <li>▪ Or if patient had been on insulin at home: Discuss and verify the home dose with the patient. After verifying dose with patient add up the total daily dose and order: 50% as basal insulin (Glargine) and 50% as prandial (Lispro) divided by three (TID AC) if eating. Hold prandial insulin if NPO.</li> <li>▪ Oral meds: discontinue metformin; may continue <u>short acting</u> glipizide if criteria not met for insulin. If criteria for initiating insulin are met, start insulin, <u>discontinue glipizide</u></li> </ul> |
| <b>Basal</b>                                        | <ul style="list-style-type: none"> <li>▪ <b><u>Begin Glargine (Lantus): Routine dose at 9:00 p.m.</u></b><br/> <b>Type 2 DM:</b> Initial dose according to time of order placement.<br/>                     If order placed between:                     <ul style="list-style-type: none"> <li>❖ 12 noon until 9 p.m. give scheduled full dose at 9 p.m.</li> <li>❖ 9 p.m. until 2 a.m. give full dose of Glargine ordered as <b>NOW</b></li> <li>❖ 2 a.m. until 12 noon give 1/3 of dose ordered as <b>NOW</b> then the <b>full dose</b> that evening at 9 p.m.<br/> <b>(1/3 of the dose is given once for immediate basal requirements)</b></li> </ul> <b>Type 1 DM:</b> Give the full dose regardless of the time of patient arrival</li> </ul>                                                                                                                    |
| <b>Prandial &amp; Supplemental (patient eating)</b> | <ul style="list-style-type: none"> <li>▪ <b><u>Begin Lispro (Humalog) TID AC Prandial and Supplemental:</u></b><br/>                     If pre-prandial BG is not at goal, add PRN supplemental Lispro to prandial dose (see supplemental algorithms on page 3).<br/>                     If initiating insulin while NPO then follow guidelines below (page 2) for prolonged NPO.</li> </ul>                                                                                                                                                                                                                                                                                                                                                                                                                                                                          |
| <b>Precautions:</b>                                 | <p>➤ <b>Dose reduction of 50% is also recommended for: 1) hepatic impairment 2) hypoglycemia prone patients ( i.e,weight based insulin calculated at 0.25 units/kg/day).</b></p>                                                                                                                                                                                                                                                                                                                                                                                                                                                                                                                                                                                                                                                                                        |

|  |                                                                                                                                                                                                                                                                                                                                    |
|--|------------------------------------------------------------------------------------------------------------------------------------------------------------------------------------------------------------------------------------------------------------------------------------------------------------------------------------|
|  | <ul style="list-style-type: none"> <li>➤ If TPN or tube feedings stopped or patient is made NPO after insulin given start D5W</li> <li>➤ If treatment with steroid is tapered or discontinued patient will require less insulin, doses may need aggressive reduction or insulin discontinued if not required previously</li> </ul> |
|--|------------------------------------------------------------------------------------------------------------------------------------------------------------------------------------------------------------------------------------------------------------------------------------------------------------------------------------|

|                                            |                                                                                                                                                                                                                                                                                                                                                                                                                                                                                                                                                                                                                      |
|--------------------------------------------|----------------------------------------------------------------------------------------------------------------------------------------------------------------------------------------------------------------------------------------------------------------------------------------------------------------------------------------------------------------------------------------------------------------------------------------------------------------------------------------------------------------------------------------------------------------------------------------------------------------------|
| <b>NPO<br/>&amp;<br/>Prolonged<br/>NPO</b> | <ul style="list-style-type: none"> <li>▪ <u>CONTINUE BASAL INSULIN</u></li> <li>▪ <u>PRANDIAL LISPRO INSULIN (TID AC)</u> is held during NPO or for a clear liquid diet (Clear Liquid Diet has insufficient calories to be considered a meal and is treated the same as NPO)</li> <li>▪ <u>SUPPLEMENTAL LISPRO INSULIN</u>: is used during prolonged NPO (miss 3 meals or more). When ordering supplemental in place of prandial insulin, the order should be every 6 hours PRN for BG&gt;200mg/dL, begin with Low Dose Algorithm, order accuchecks every 6 hours. Recommend ordering an IV with dextrose</li> </ul> |
|--------------------------------------------|----------------------------------------------------------------------------------------------------------------------------------------------------------------------------------------------------------------------------------------------------------------------------------------------------------------------------------------------------------------------------------------------------------------------------------------------------------------------------------------------------------------------------------------------------------------------------------------------------------------------|

### **NPO, Tube Feeds, TPN**

|                          |                                                                                                                                                                                                                                                                                                                                                                                                                                                                                                                                                                                                                                                                                                                                                                                                                                                                                                                                                                                                                                                                                                                              |
|--------------------------|------------------------------------------------------------------------------------------------------------------------------------------------------------------------------------------------------------------------------------------------------------------------------------------------------------------------------------------------------------------------------------------------------------------------------------------------------------------------------------------------------------------------------------------------------------------------------------------------------------------------------------------------------------------------------------------------------------------------------------------------------------------------------------------------------------------------------------------------------------------------------------------------------------------------------------------------------------------------------------------------------------------------------------------------------------------------------------------------------------------------------|
| <b>Tube<br/>Feedings</b> | <ul style="list-style-type: none"> <li>▪ If continuous tube feedings or TPN is initiated and blood glucose results satisfy criteria for insulin, use initial basal dosing for Glargine and use supplemental Lispro:               <ol style="list-style-type: none"> <li>1. Order Low Dose Lispro supplemental algorithm in PRN orders to be given every 6 hours for BG &gt;200mg/dL</li> <li>2. Order accuchecks to be done every 6 hours</li> <li>3. Upward titrate basal insulin (Glargine) for blood glucose control by calculating the total supplemental Lispro required for 24 hours and adding 50% of that total to Glargine.</li> </ol> </li> <li>▪ If tube feedings are given per bolus then continue TID AC guidelines for Glargine and Lispro.</li> <li>▪ If tube feedings or TPN are interrupted or discontinued then decrease insulin dose and/or:               <ol style="list-style-type: none"> <li>1. If discontinuing tube feedings then begin IV with dextrose (D5)</li> <li>2. If discontinuing TPN then begin IV with dextrose (D10) at the same rate that TPN had been given.</li> </ol> </li> </ul> |
| <b>Or</b>                |                                                                                                                                                                                                                                                                                                                                                                                                                                                                                                                                                                                                                                                                                                                                                                                                                                                                                                                                                                                                                                                                                                                              |
| <b>TPN</b>               |                                                                                                                                                                                                                                                                                                                                                                                                                                                                                                                                                                                                                                                                                                                                                                                                                                                                                                                                                                                                                                                                                                                              |

## Supplemental Algorithm for Hyperglycemia (Lispro/Humalog) – give in addition to prandial insulin

| Pre-meal BG (mg/dL) | <u>Very Low Dose Algorithm</u><br><15 units insulin/day | <u>Low Dose Algorithm</u><br>15-40 units insulin/day | <u>Medium Dose Algorithm</u><br>40-80 units of insulin/day | <u>High Dose Algorithm</u><br>>80 units of insulin/day |
|---------------------|---------------------------------------------------------|------------------------------------------------------|------------------------------------------------------------|--------------------------------------------------------|
| 150-199             | 0 unit                                                  | 1 unit                                               | 1 unit                                                     | 2 unit                                                 |
| 200-249             | 1 unit                                                  | 2 units                                              | 3 units                                                    | 4 units                                                |
| 250-299             | 1 unit                                                  | 3 units                                              | 5 units                                                    | 6 units                                                |
| 300-349             | 2 units                                                 | 4 units                                              | 7 units                                                    | 8 units                                                |
| >349                | 2 units (>400 call MD)                                  | 5 units                                              | 9 units                                                    | 10 units                                               |

## Insulin Adjustment Based on BG

| Abnormal Blood Glucose | Insulin Dose to Adjust    | Meal to Target                  |
|------------------------|---------------------------|---------------------------------|
| Pre-lunch              | Pre-breakfast RA* insulin | Breakfast or mid- morning snack |
| Pre-dinner             | Pre-lunch RA* insulin     | Lunch +/- mid afternoon snack   |
| Bedtime                | Pre-dinner RA* insulin    | Dinner                          |
| Morning Fasting BG     | Evening Glargine          | Bedtime snack                   |

\*RA = RAPID ACTING

## Adjusting Basal Insulin

| Blood glucose target                                              | Glargine insulin dose adjustment          |
|-------------------------------------------------------------------|-------------------------------------------|
| If FBG is <50 mg/dL or severe hypoglycemia event                  | Decrease dose by 50%                      |
| If FBG is < 50 to 70 mg/dL                                        | Decrease dose by 20%                      |
| If FBG is 70-100mg/dL                                             | Decrease by 10%                           |
| If FBG is >180mg/dL and < 200 mg/dL and no hypoglycemic episodes  | Increase dose by 10% of the previous dose |
| If FBG is > 200 mg/dL and <250 mg/dL and no hypoglycemic episodes | Increase dose by 20% of the previous dose |
| If FBG is > 250 mg/dL and no hypoglycemic episodes                | Increase dose by 30% of the previous dose |

## **Adjusting Prandial Insulin**

Prandial insulin is adjusted according to the amount of supplemental insulin given the day before. If the pre-prandial BG is > than 150mg/dL and the patient was given supplemental doses of insulin the day before, the total of all supplemental doses from the day before will be divided by 3 and added to each prandial dose of insulin.

If no supplemental dose was given the day before and the non-fasting pre-prandial blood glucose is above 150mg/dL, the prandial dose may be increased by 10% of the previous dose. Please ensure supplemental is given.
